# Supplementary material for: MiR-184 expression is regulated by AMPK in pancreatic islets
Source: PubMed Central journal article supplement (PMC6207280; doi:10.1096/fj.201701100r), 2018-01-08
Supplement: fj.201701100R.sf2.pdf [file fj.201701100R.sf2.pdf]

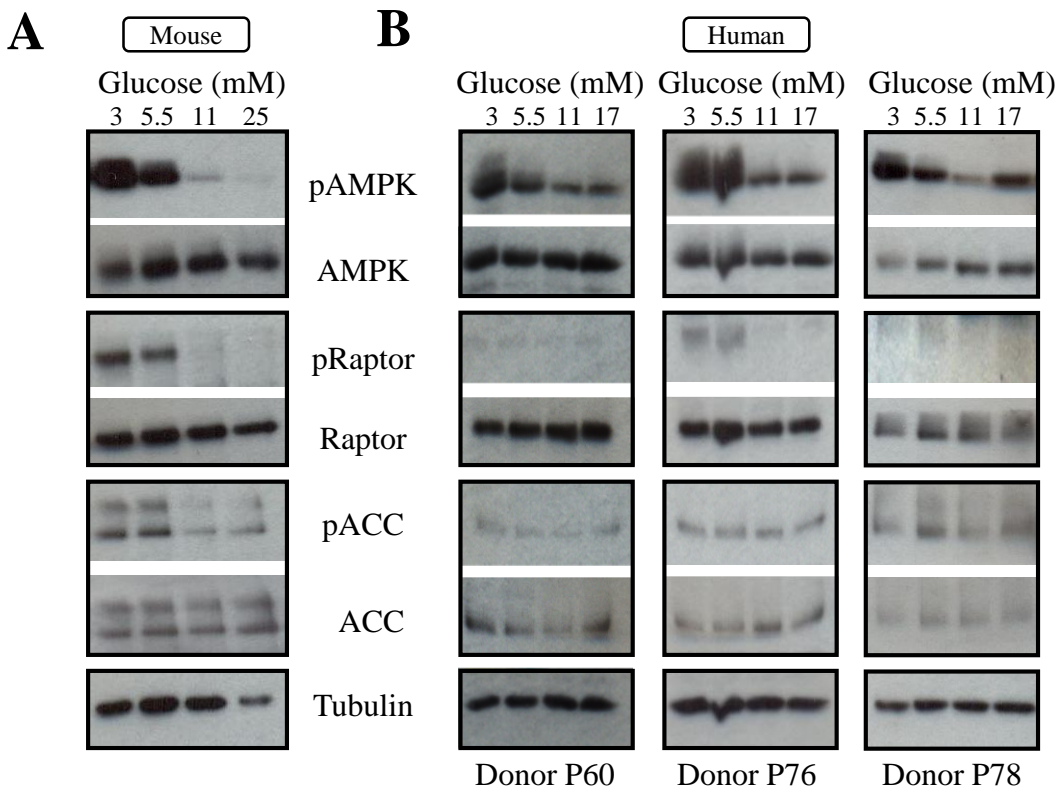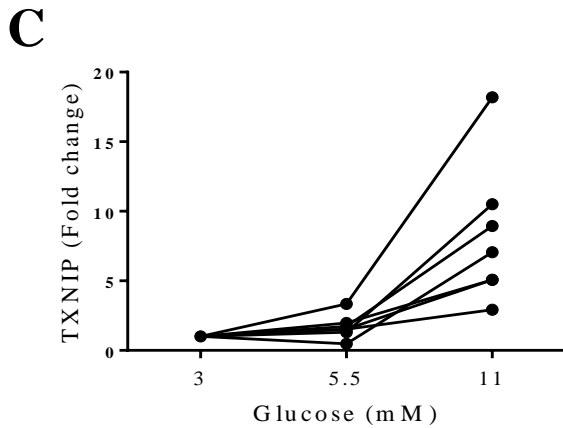

**Supplemental Figure 2. Increasing glucose concentration reduces AMPK activity in mouse and human islets.** Phosphorylation of AMPK at Thr172 (pAMPK) and of its targets Raptor (pRaptor) and ACC (pACC) as well as total protein (AMPK, Raptor, ACC) assessed by Western (immuno-) blotting using specific antibodies with extracts from **A**) mouse islets and **B**) human islets from three different donors cultured at the indicated glucose concentration for 48h. **C**) *TXNIP* expression was assessed in human islets cultured at the indicated glucose concentration for 48h. Data were normalized by the expression of endogenous *Ppia* and are expressed as fold-change vs. the 3mM glucose sample. Each line represents islets from a different donor and correspond to those used in Figure 5B.
