# Supplementary material for: MiR-184 expression is regulated by AMPK in pancreatic islets
Source: PubMed Central journal article supplement (PMC6207280; doi:10.1096/fj.201701100r), 2018-01-08
Supplement: fj.201701100R.sf4.pdf [file fj.201701100R.sf4.pdf]

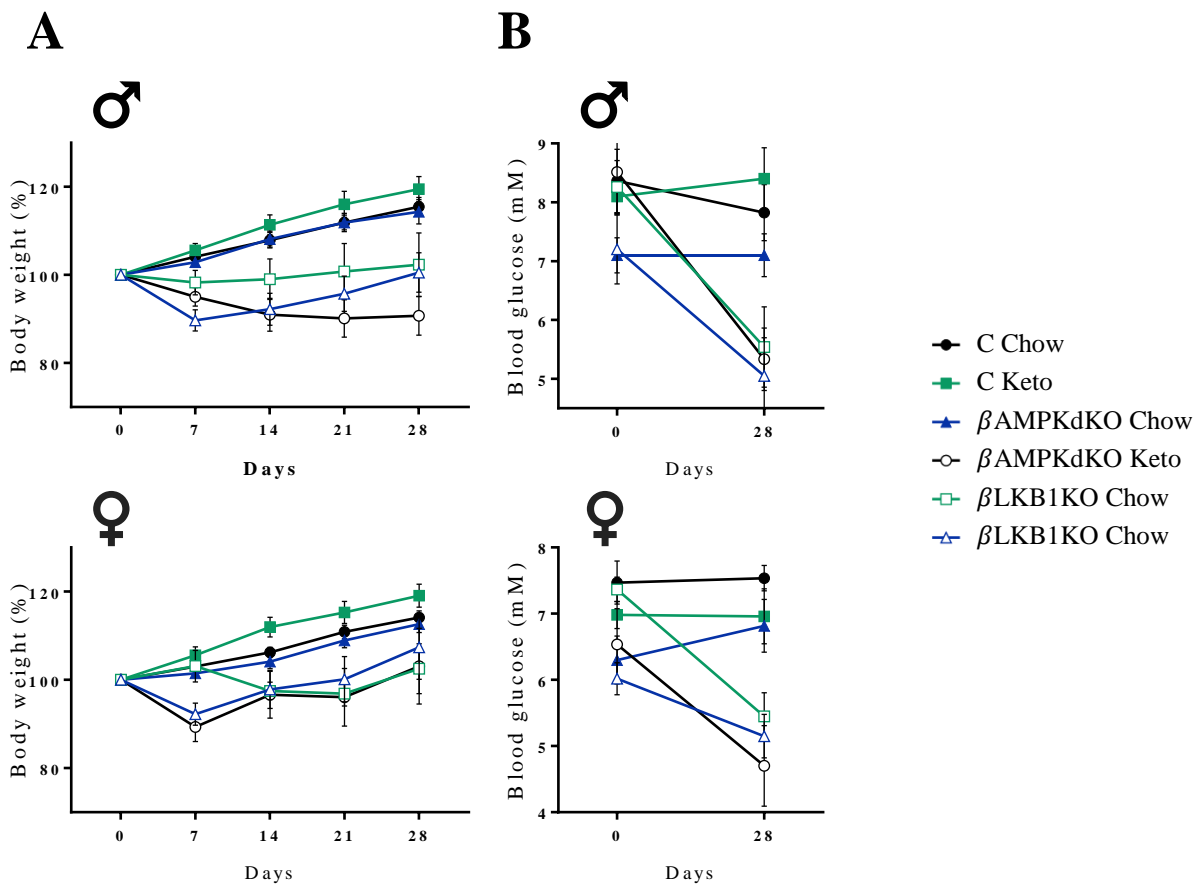

**Supplemental Figure 4. Mice fed a ketogenic diet display reduced weight and glycaemia A) Body weight and B) randomly-fed glycaemia of  $\beta$ AMPKdKO (green),  $\beta$ LKB1KO (blue) and control (C, black) male and female mice fed a chow (Chow-full symbols) or a ketogenic (Keto-empty symbols) diet for 28 days.**
